# Supplementary material for: Increasing the low lipid phosphate phosphatase 1 activity in breast cancer cells decreases transcription by AP-1 and expressions of matrix metalloproteinases and cyclin D1/D3
Source: PubMed Central journal article supplement (PMC6735510; doi:10.7150/thno.37094), 2019-08-14
Supplement: thnov09p6129s1.pdf [file thnov09p6129s1.pdf]

# Supplementary Figure 1

## A BT-549 cells

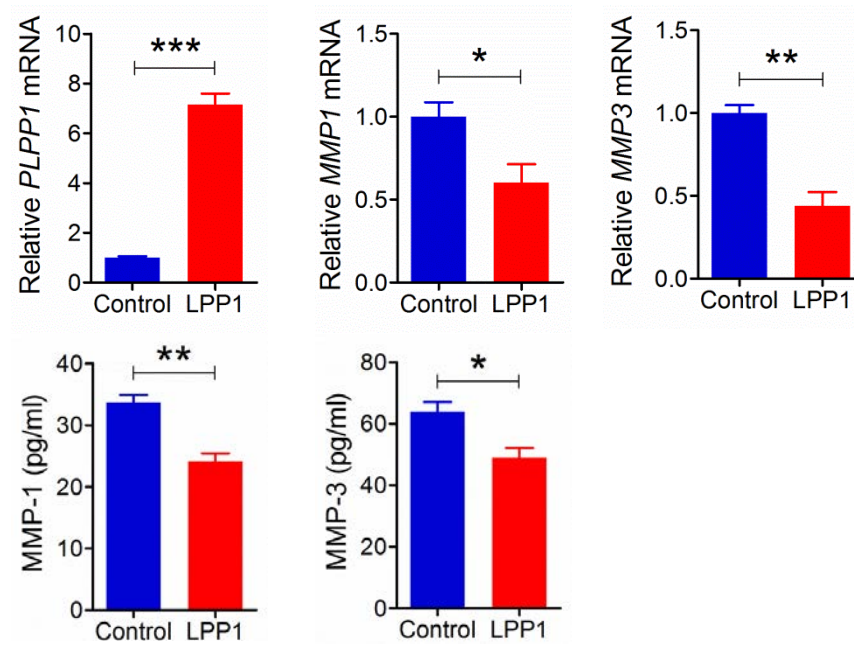

## B 4T1 cells

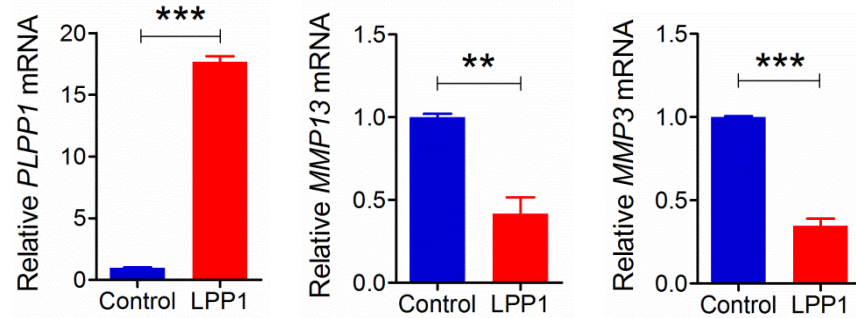

**Supplementary Figure 1. A:** Effects of increasing LPP1 (*PLPP1*) expression on mRNA and protein levels of MMP-1 and MMP-3 in BT-549 human breast cancer cells. **B:** Effects of increasing LPP1 (*PLPP1*) expression on mRNA levels of MMP-13 and MMP-3 in 4T1 mouse breast cancer cells. Results are means and SEM from three independent experiments and analyzed by Student's *t*-test. \**P*<0.05, \*\**P*<0.01, \*\*\**P*<0.001.

## Supplementary Figure 2

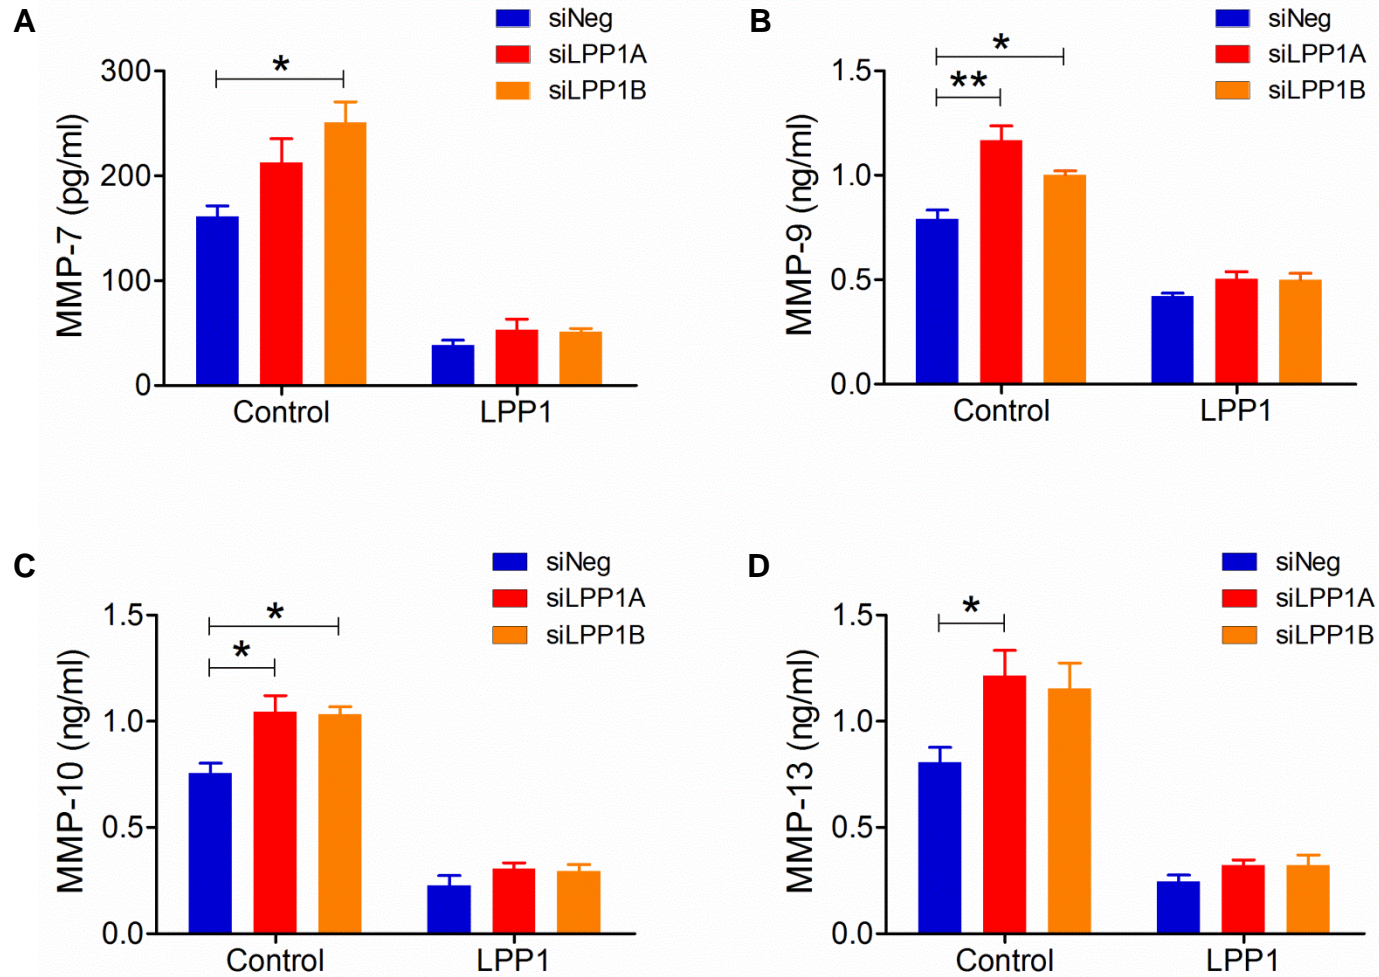

**Supplementary Figure 2.** Knockdown of LPP1 increased concentrations of MMP-7 (A), MMP-9 (B), MMP-10 (C) and MMP-13 (D) in the conditioned media from control MDA-MB-231 cells, but did not reverse the inhibition by LPP1 overexpression. Results are means and SEM and analyzed by ANOVA.  $n=6$ ,  $*P<0.05$ ,  $**P<0.01$ .

# Supplementary Figure 3

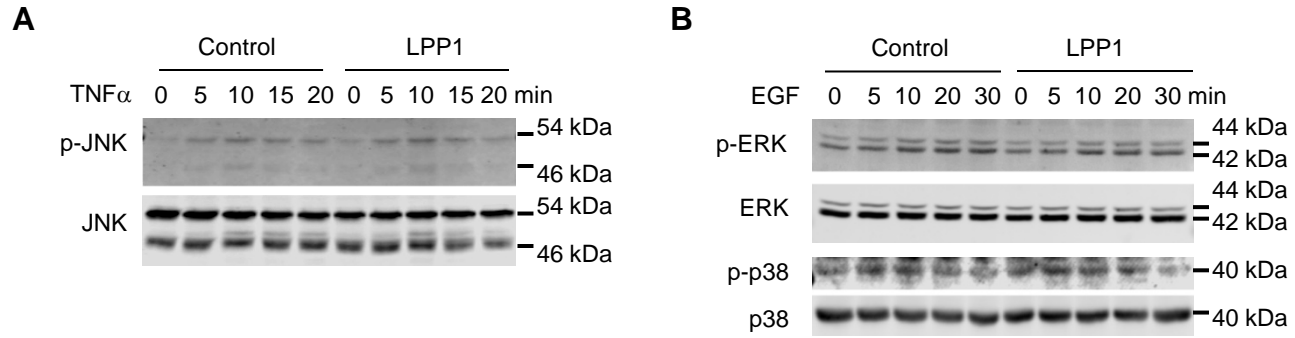

**Supplementary Figure 3. A:** Effects of TNF $\alpha$  (50ng/ml) on the JNK phosphorylation, and **B:** effects of EGF (100 ng/ml) on phosphorylation of ERK and p38 in MDA-MB-231 cells with or without increased expression of LPP1.

## Supplementary Figure 4

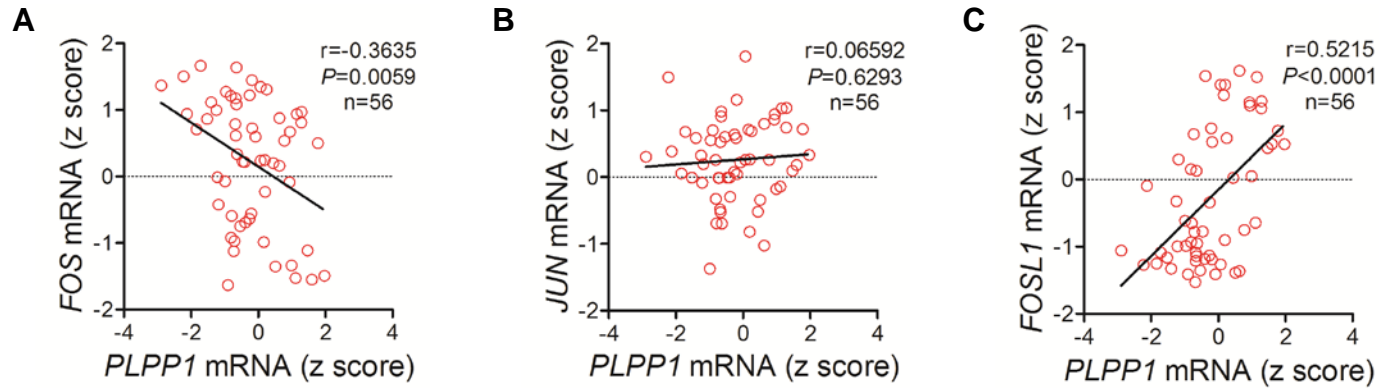

**Supplementary Figure 4.** **A:** Correlation between mRNA levels of LPP1 (*PLPP1*) and cFOS (*FOS*), and **B:** correlation between mRNA levels of LPP1 and cJUN (*JUN*), and **C:** correlation between mRNA levels of LPP1 and FRA1 (*FOSL1*) in 56 breast cancer cell lines. Data were obtained from Cancer Cell Line Encyclopedia of the Broad Institute and Novartis.

## Supplementary Figure 5

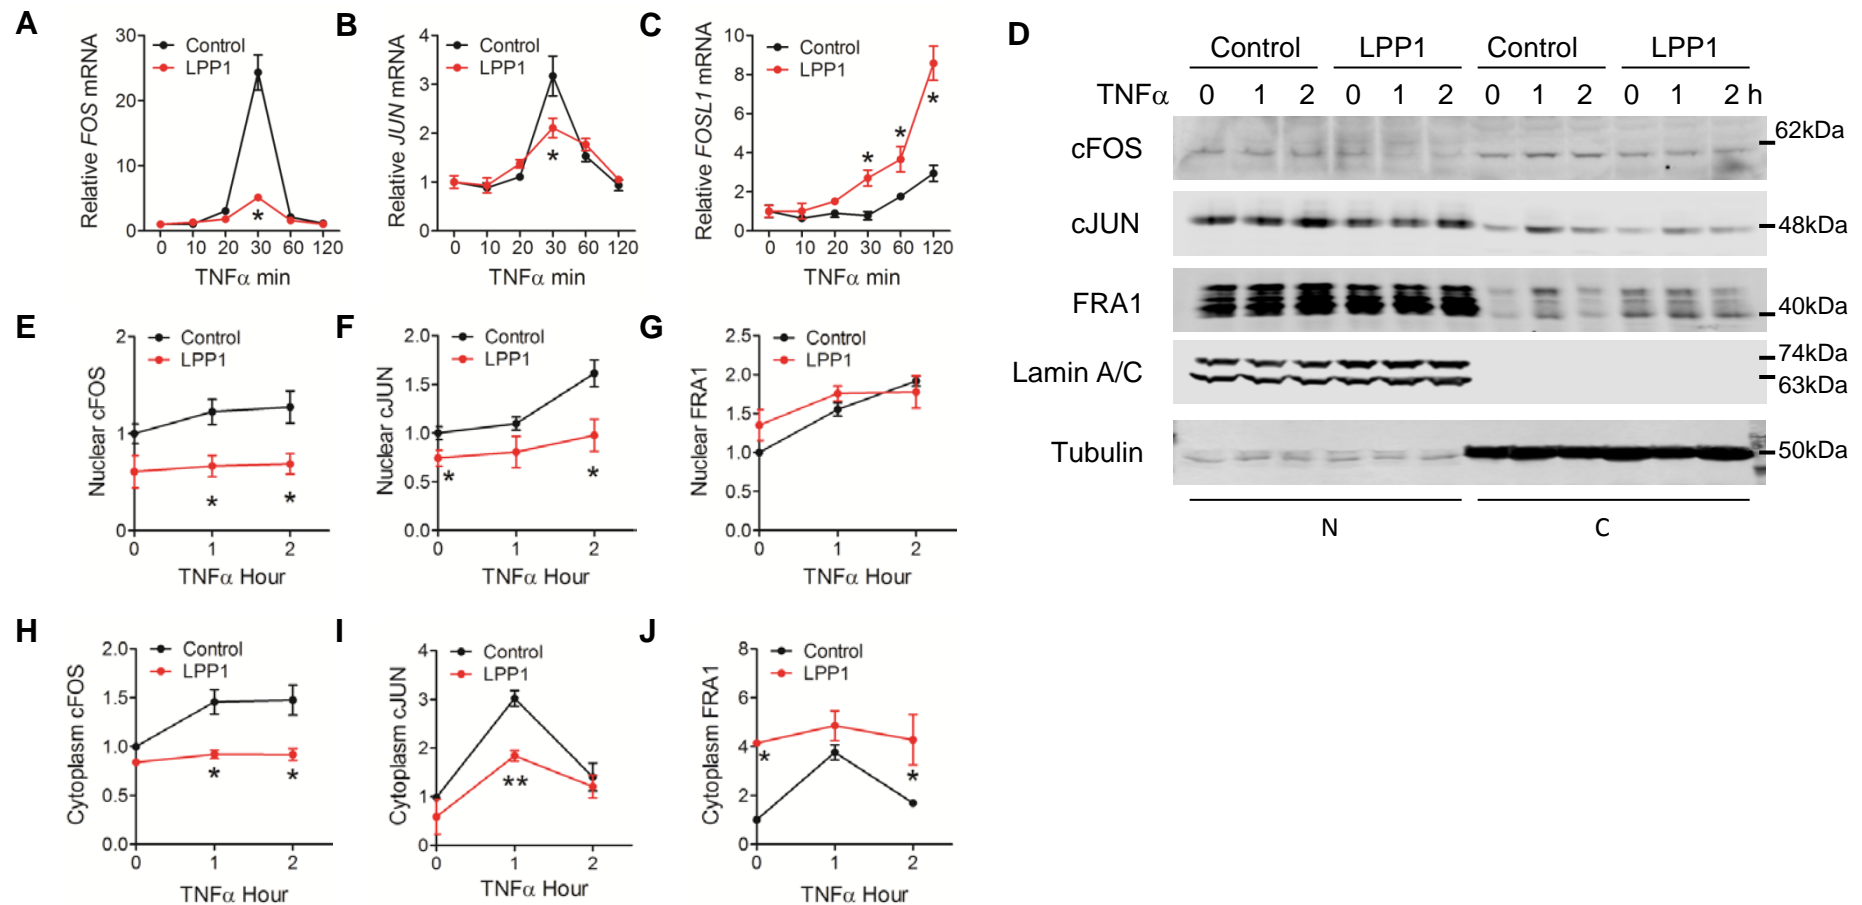

**Supplementary Figure 5. A, B and C:** Time course of cFOS (*FOS*), cJUN (*JUN*) and FRA1 (*FOSL1*) mRNA expressions induced by 50 ng/ml TNF $\alpha$  in MDA-MB-231 cell with or without increased LPP1. **D:** TNF $\alpha$ -induced expressions of cFOS, cJUN and FRA1 in cytoplasm (C) and nuclei (N) of MDA-MB-231 cells with or without increased LPP1. **E - J:** Quantification of the western blotting results. Results are means and SEM from three independent experiments, and analyzed by ANOVA. \* $P < 0.05$ , \*\* $P < 0.01$ .

## Supplementary Figure 6

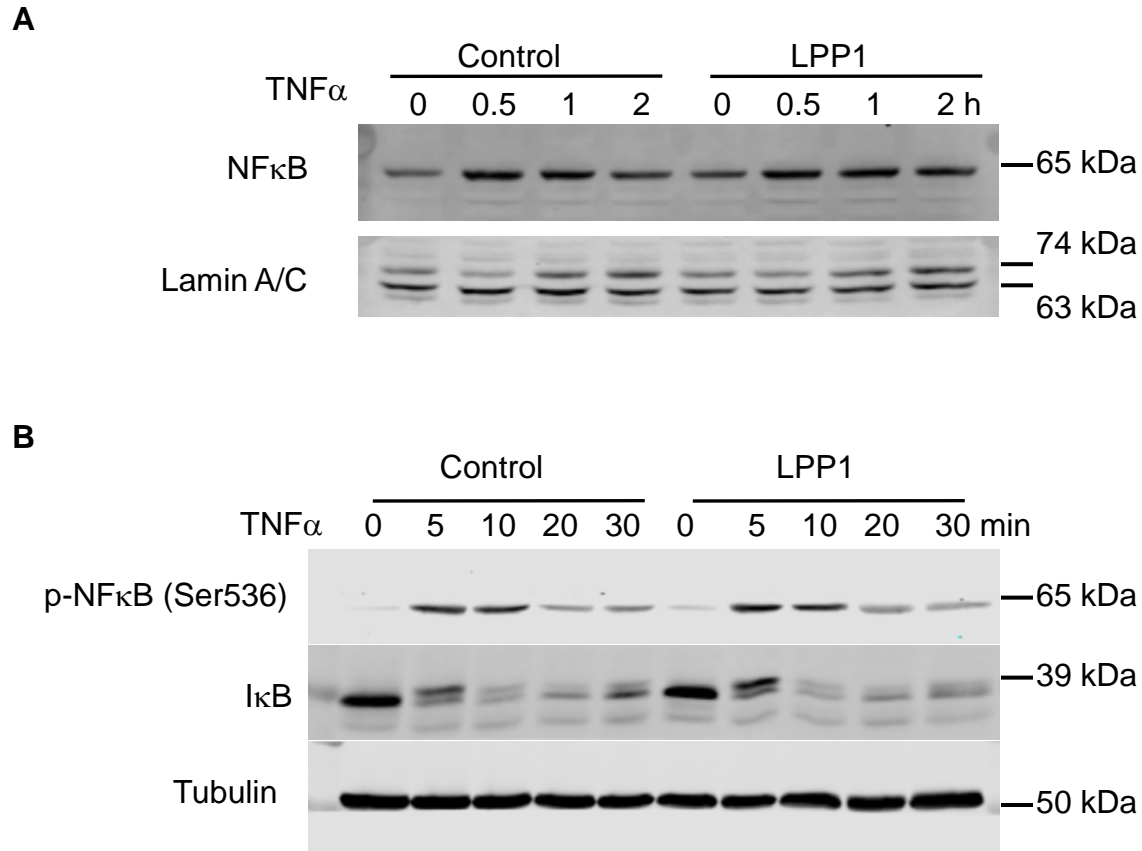

**Supplementary Figure 6. A:** TNF $\alpha$  (50 ng/ml) induced increase of NF $\kappa$ B in nuclei of control and LPP1 overexpressing MDA-MB-231 cells. **B:** TNF $\alpha$  (50 ng/ml) induced phosphorylation of NF $\kappa$ B and degradation of I $\kappa$ B in total cell lysates of control and LPP1 overexpressing MDA-MB-231 cells. Rabbit anti-NF $\kappa$ B (#8242), rabbit anti-phospho-NF $\kappa$ B (#3033) and mouse anti-I $\kappa$ B (#4814) antibodies were from Cell Signaling Technology.

## Supplementary Figure 7

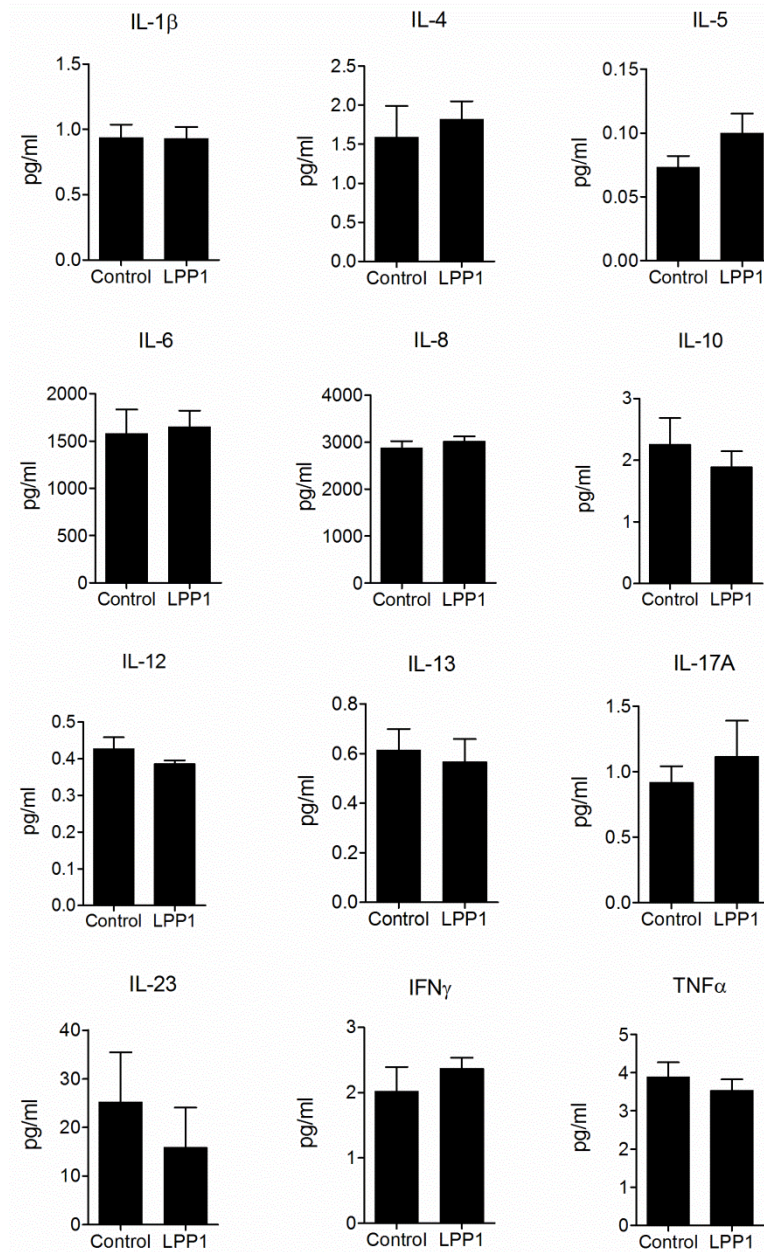

**Supplementary Figure 7:** Cytokine concentrations in the conditioned media of MDA-MB-231 cells with or without increased LPP1 expression. Results are means and SEM from three independent experiments.
